# Supplementary material for: Surface-enhanced Raman spectroscopy for facile DNA detection using gold nanoparticle aggregates formed via photoligation
Source: Royal Society of Chemistry journal article supplement (doi:10.1039/b919969a), 2010-01-01
Supplement: b919969a.pdf [file b919969a.pdf]

## Supporting Information

### Surface-Enhanced Raman Spectroscopy for Facile DNA Detection using Gold Nanoparticle Aggregates Formed *via* Photoligation

*Nguyen T. B. Thuy, Ryoko Yokogawa, Yoshinaga Yoshimura,  
Kenzo Fujimoto, Mikio Koyano, Shinya Maenosono\**

#### Results of HPLC analyses

**T-DNA:** 5'-TACACTGAAGTGAAAAGTGTGAGTG-3' (25-mer)

**P1:** 5'-HS-ACTCACAGTTTTTCAC-3' (15-mer, 5'-SH)

**P2:** 5'-<sup>CV</sup>UTCAGTGTA-SH-3' (9-mer, 3'-SH)

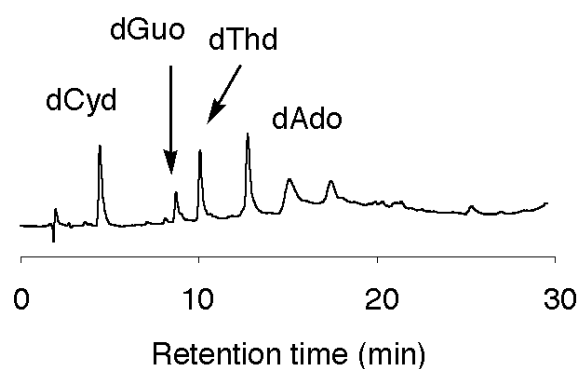

**Figure S1.** HPLC analysis of the products obtained during enzymatic digestion of P1.

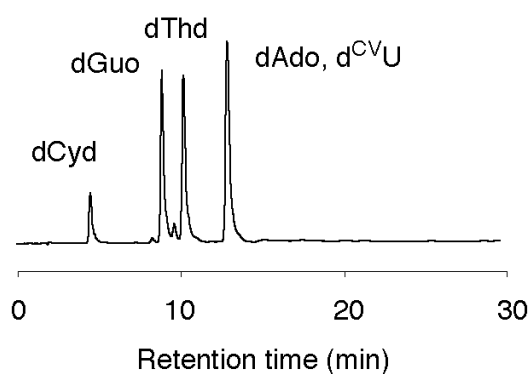

**Figure S2.** HPLC analysis of the products obtained during enzymatic digestion of P2.

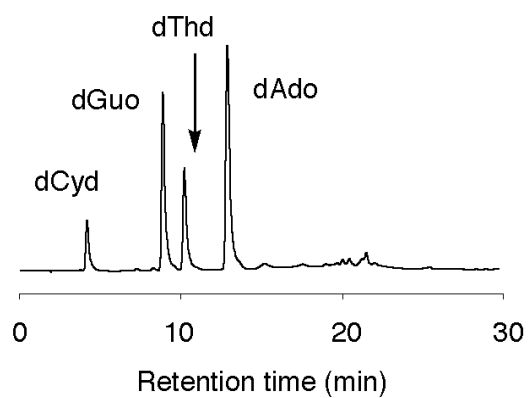

**Figure S3.** HPLC analysis of the products obtained during enzymatic digestion of T-DNA.

## Results of MALDI-TOF-MS analyses

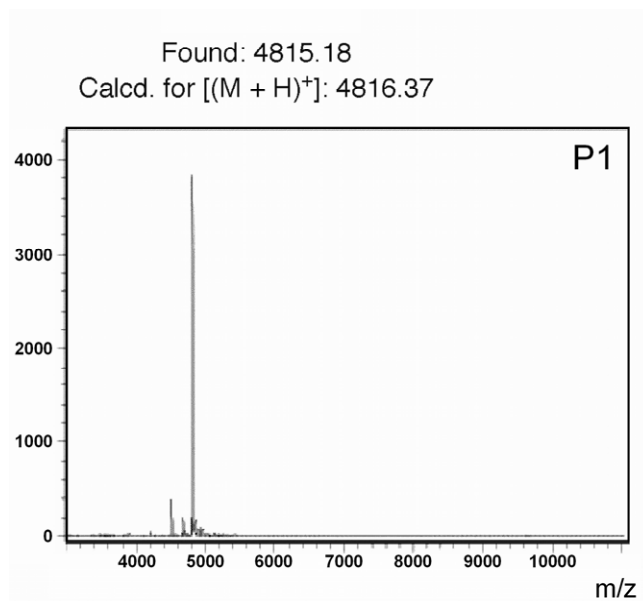

**Figure S4.** MALDI-TOF-MS analysis of P1 using 3-hydroxypicolinic acid as a matrix.

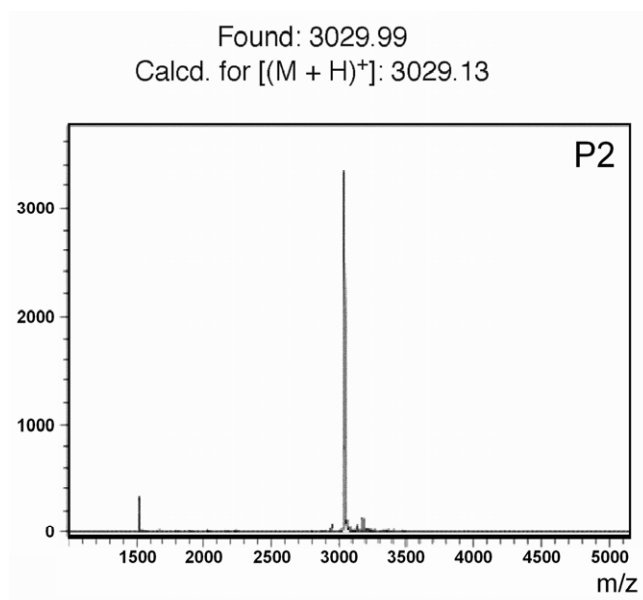

**Figure S5.** MALDI-TOF-MS analysis of P2 using 3-hydroxypicolinic acid as a matrix.

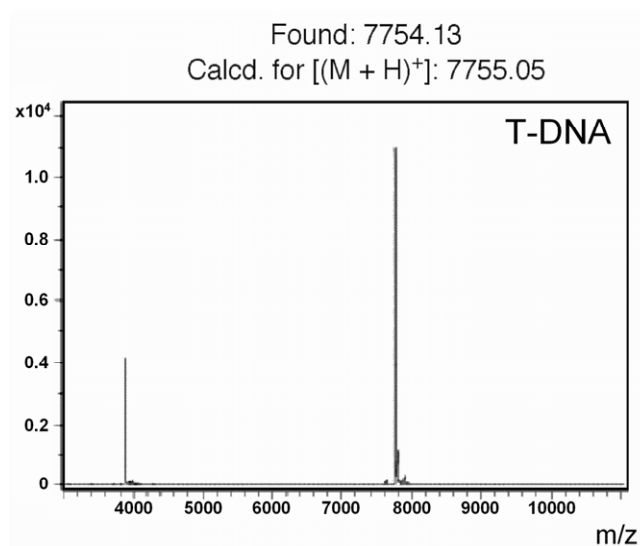

**Figure S6.** MALDI-TOF-MS analysis of T-DNA using 3-hydroxypicolinic acid as a matrix.
